# Supplementary material for: Antigenic Maps of Influenza A(H3N2) Produced With Human Antisera Obtained After Primary Infection
Source: PubMed Central journal article supplement (PMC4676547; doi:10.1093/infdis/jiv367), 2015-07-03

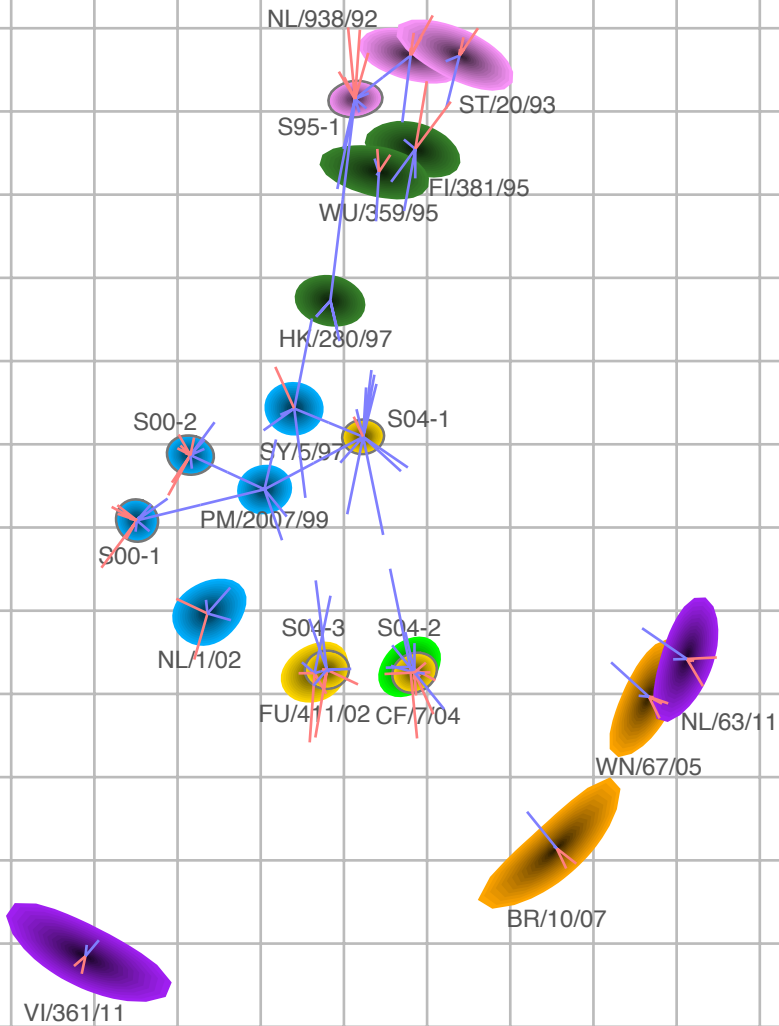

**A**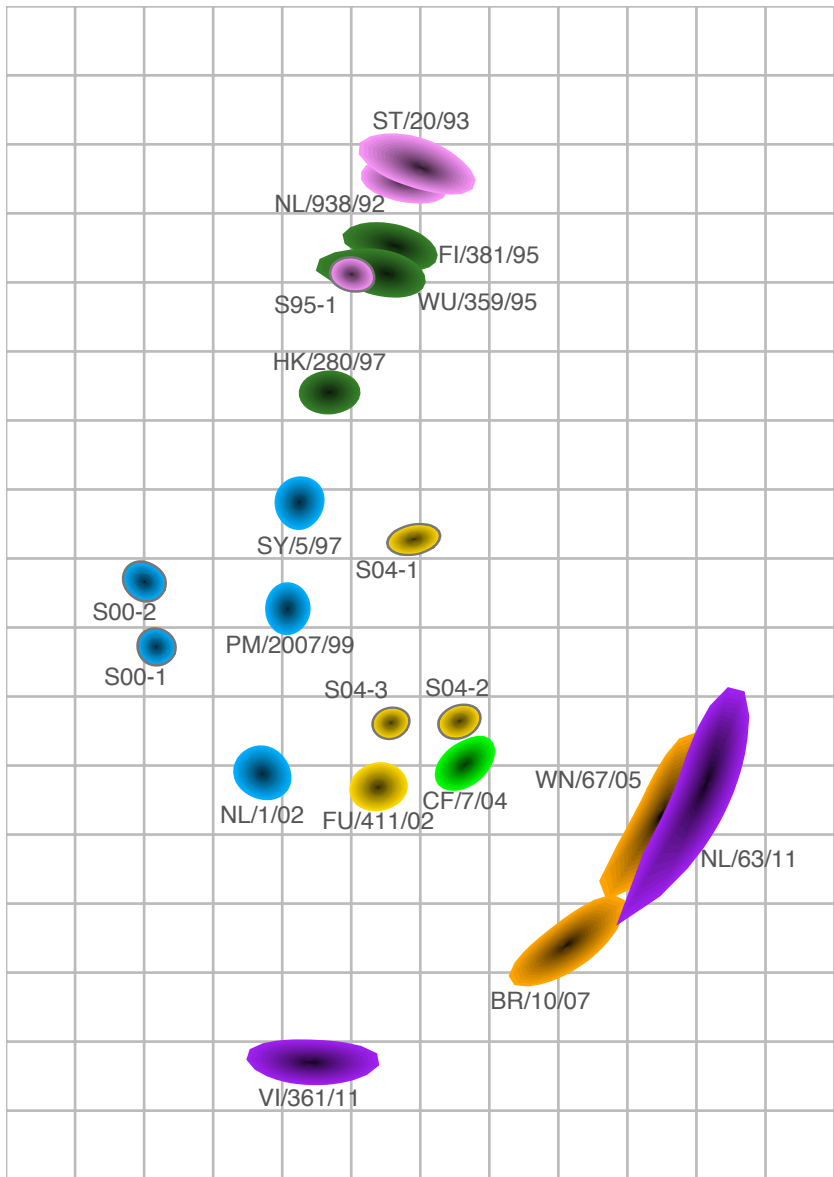**B**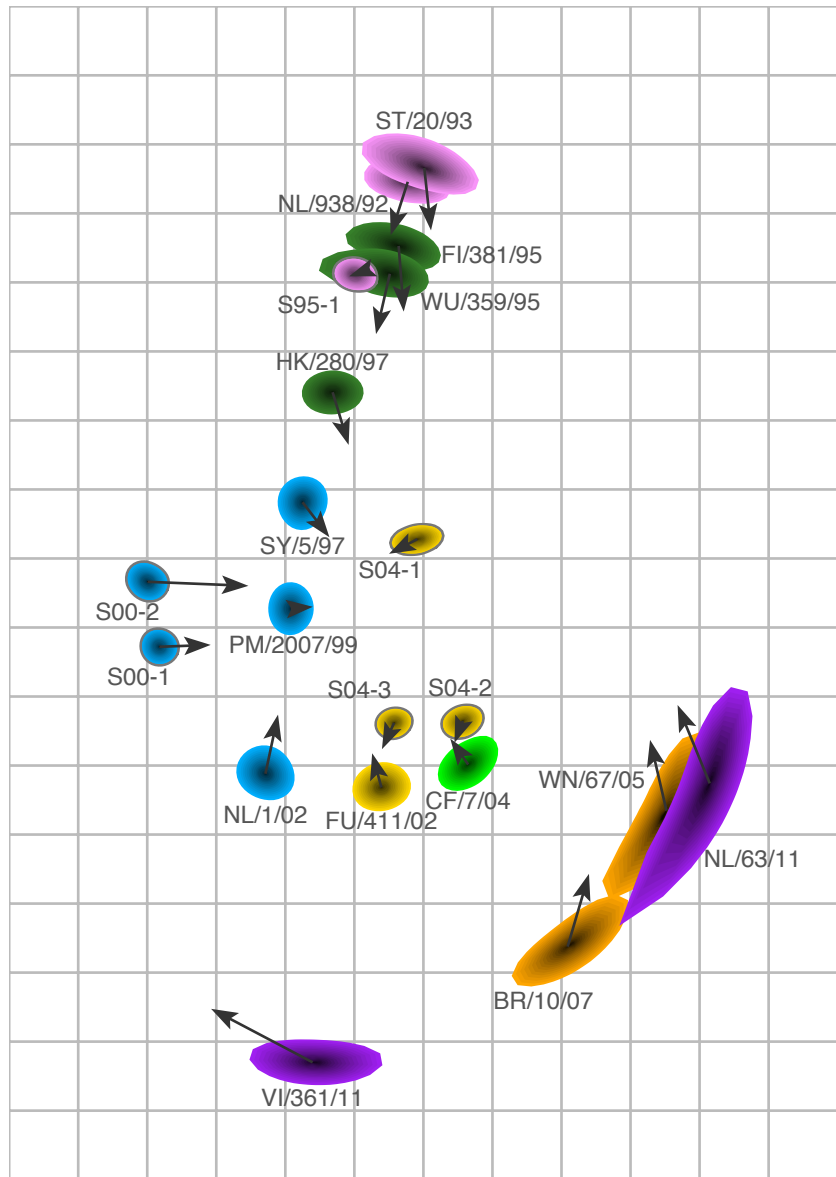

A

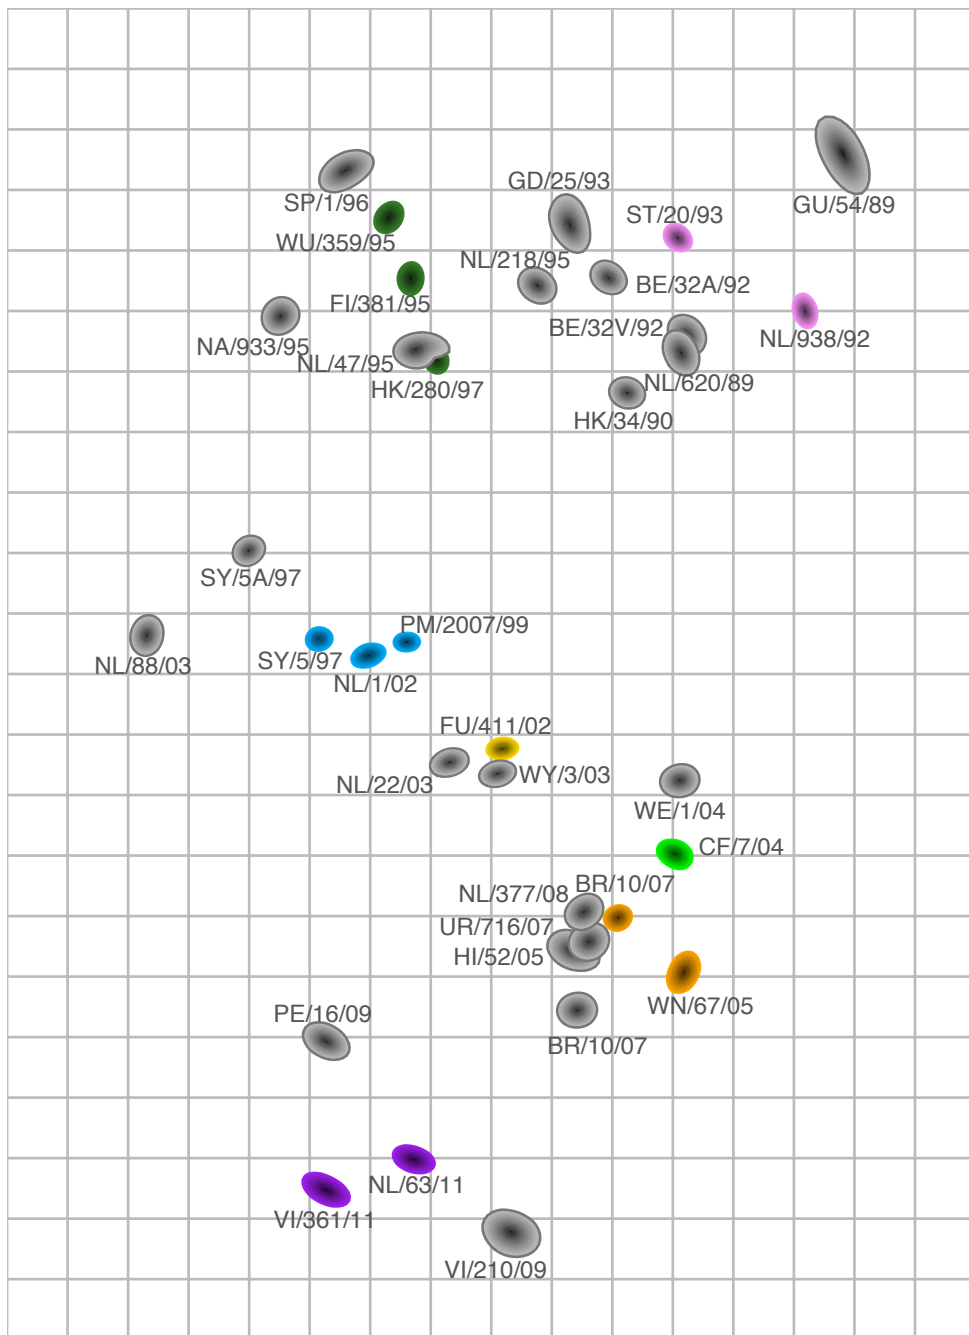

B

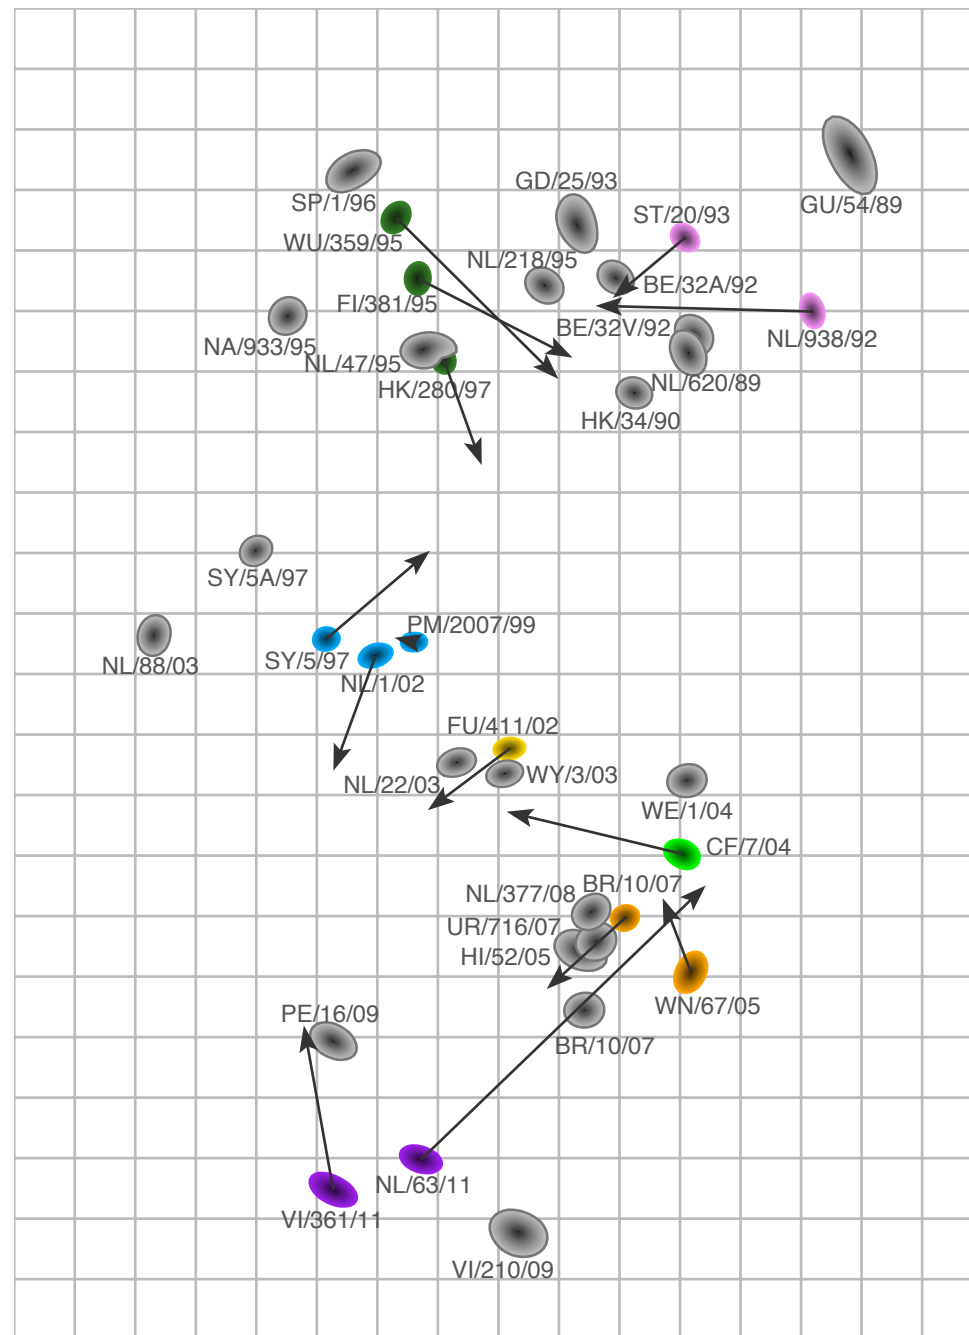

**A**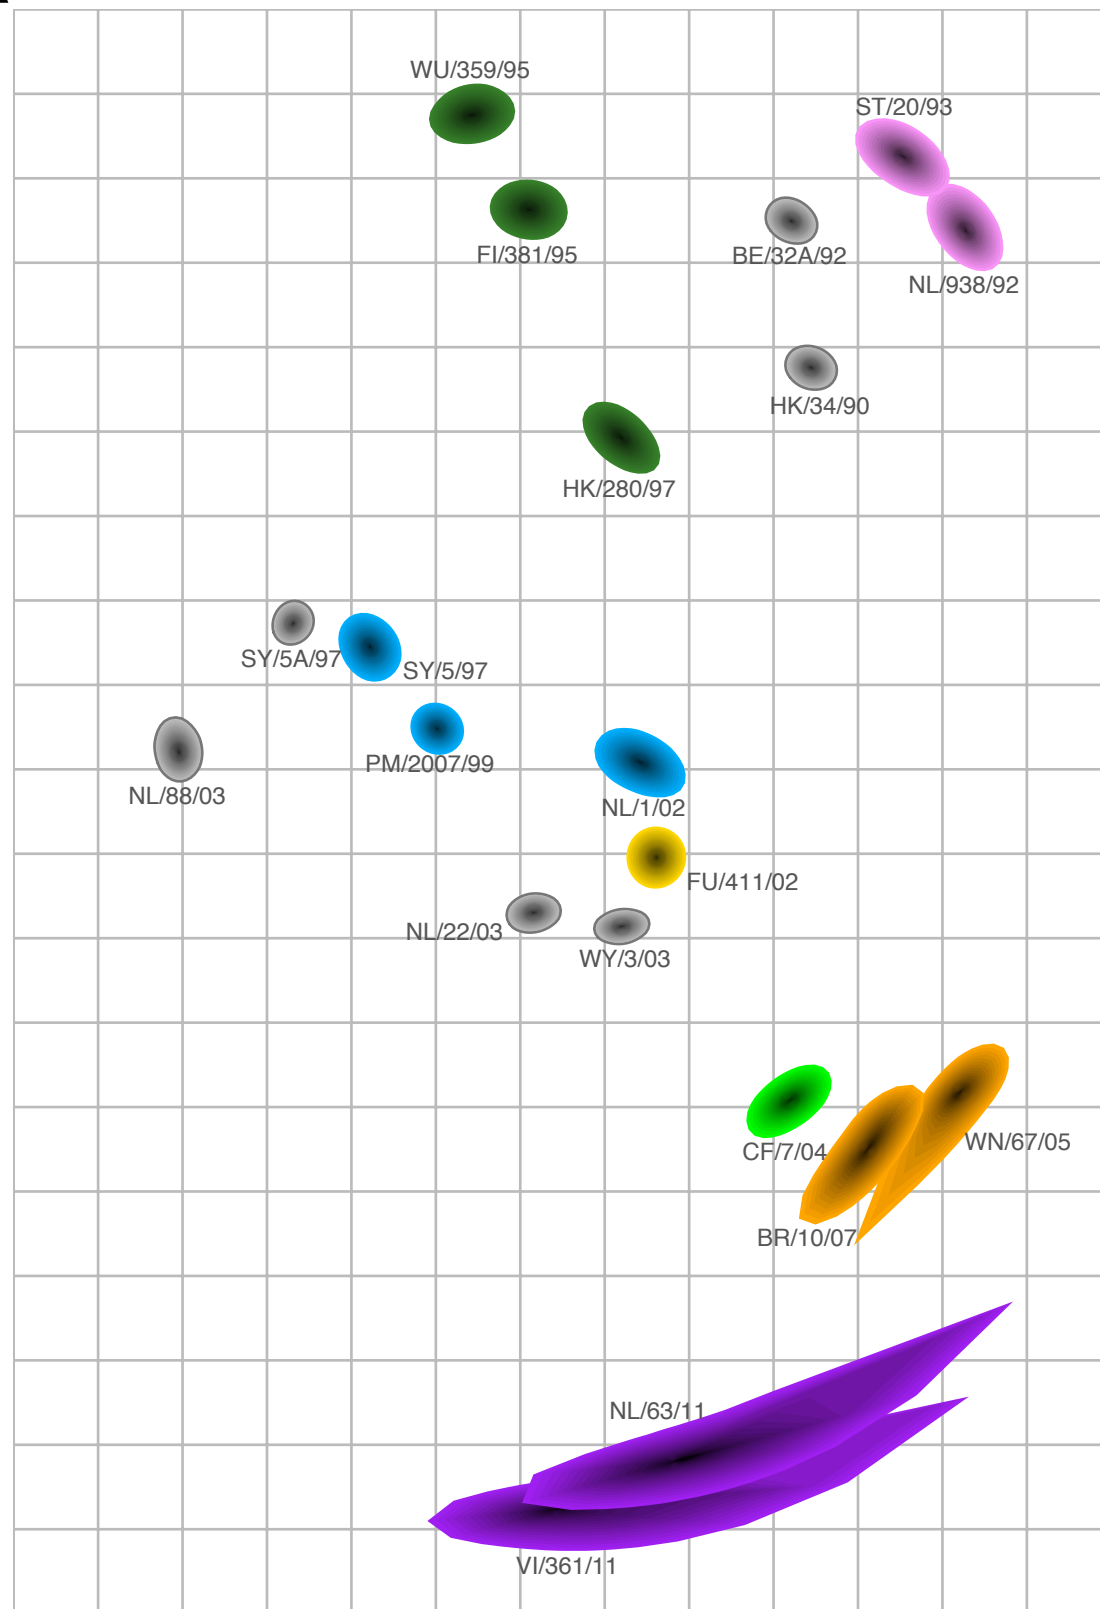**B**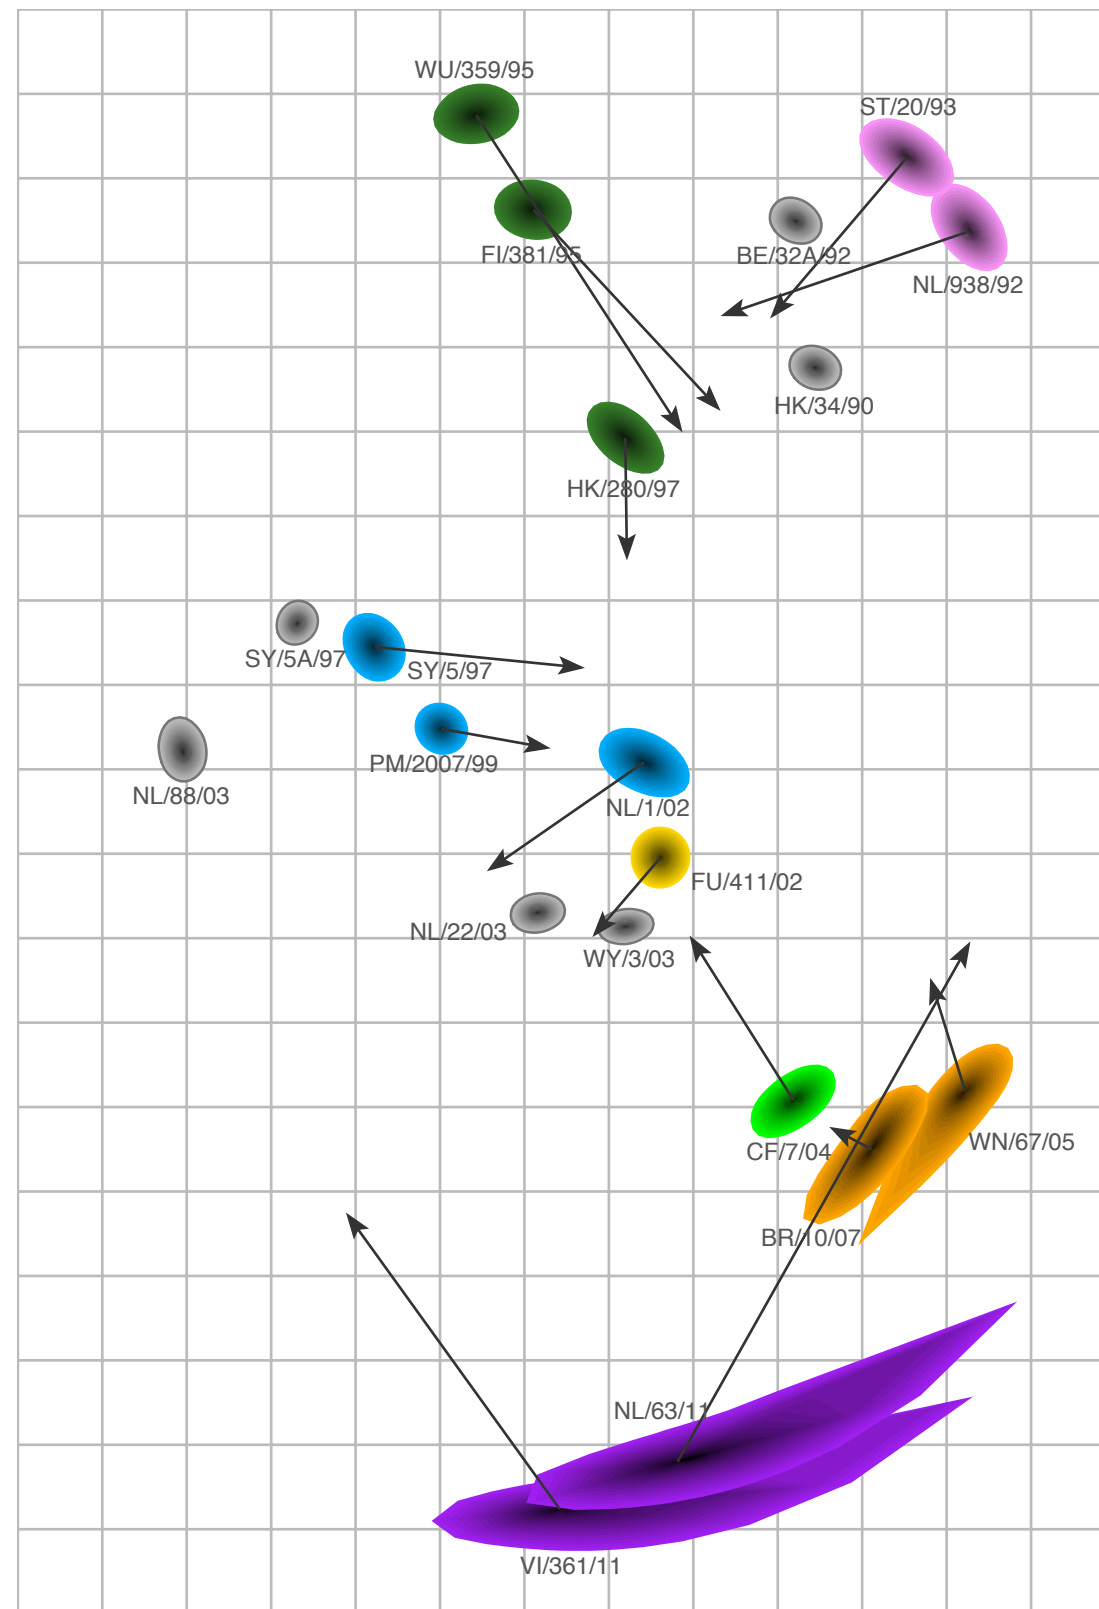**C**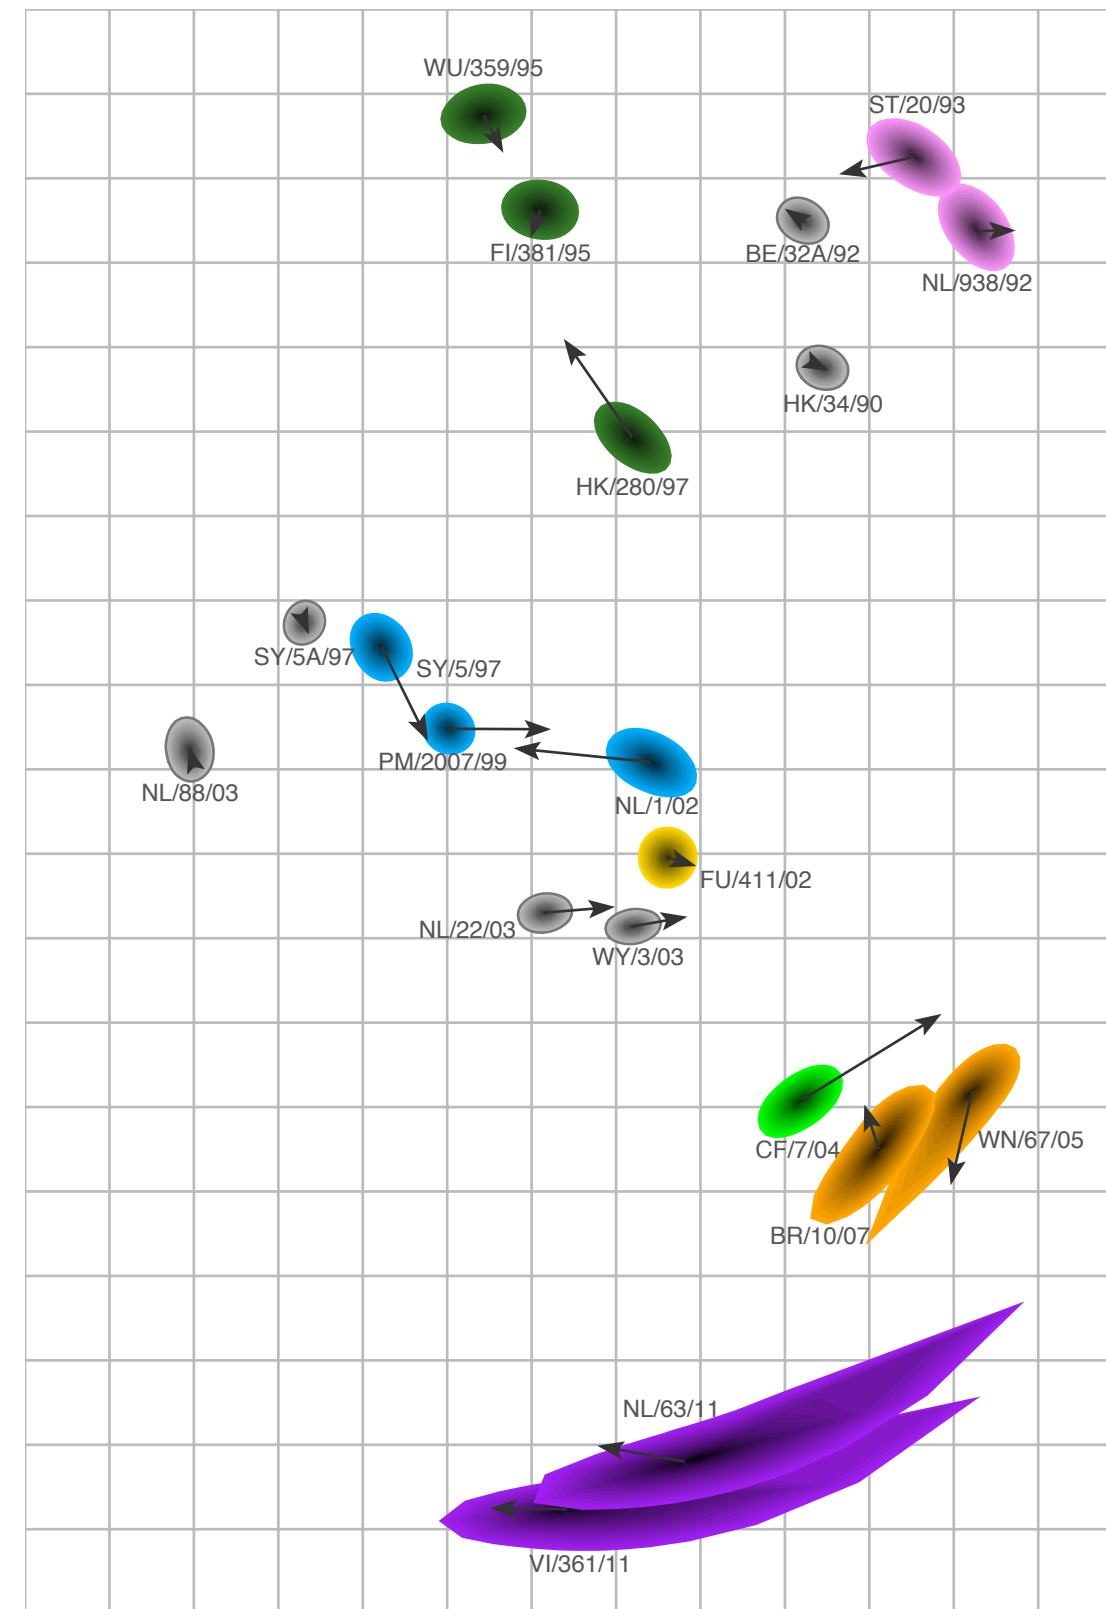

S95-1  
BE/32A/92

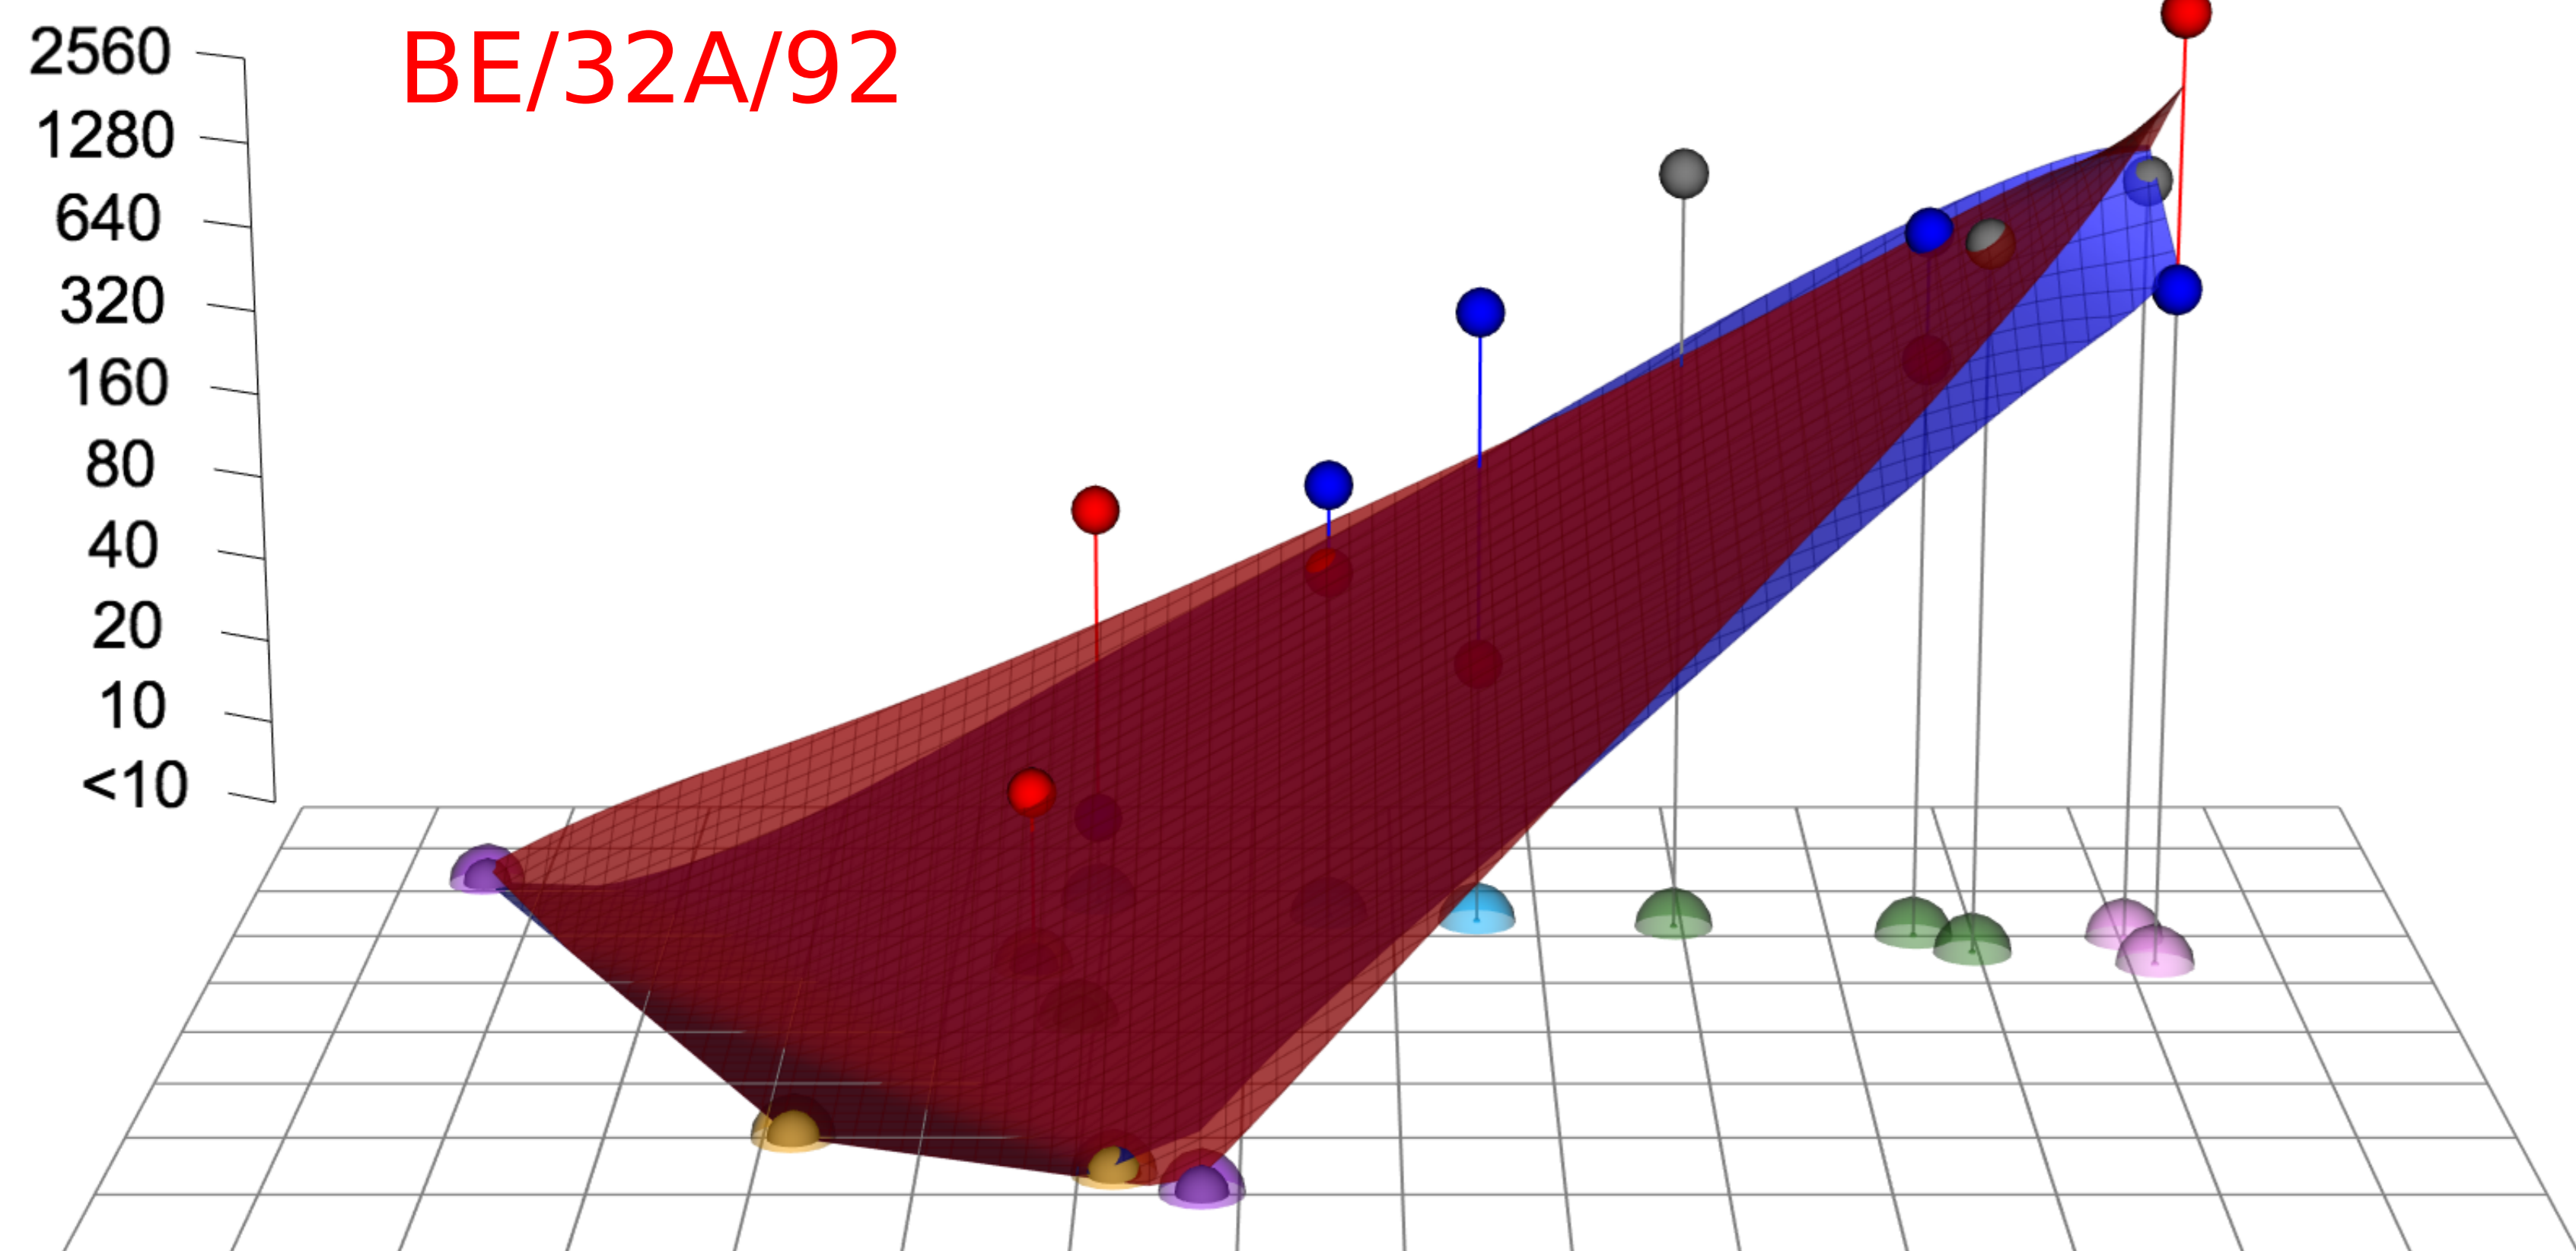

S00-1  
NL/88/03

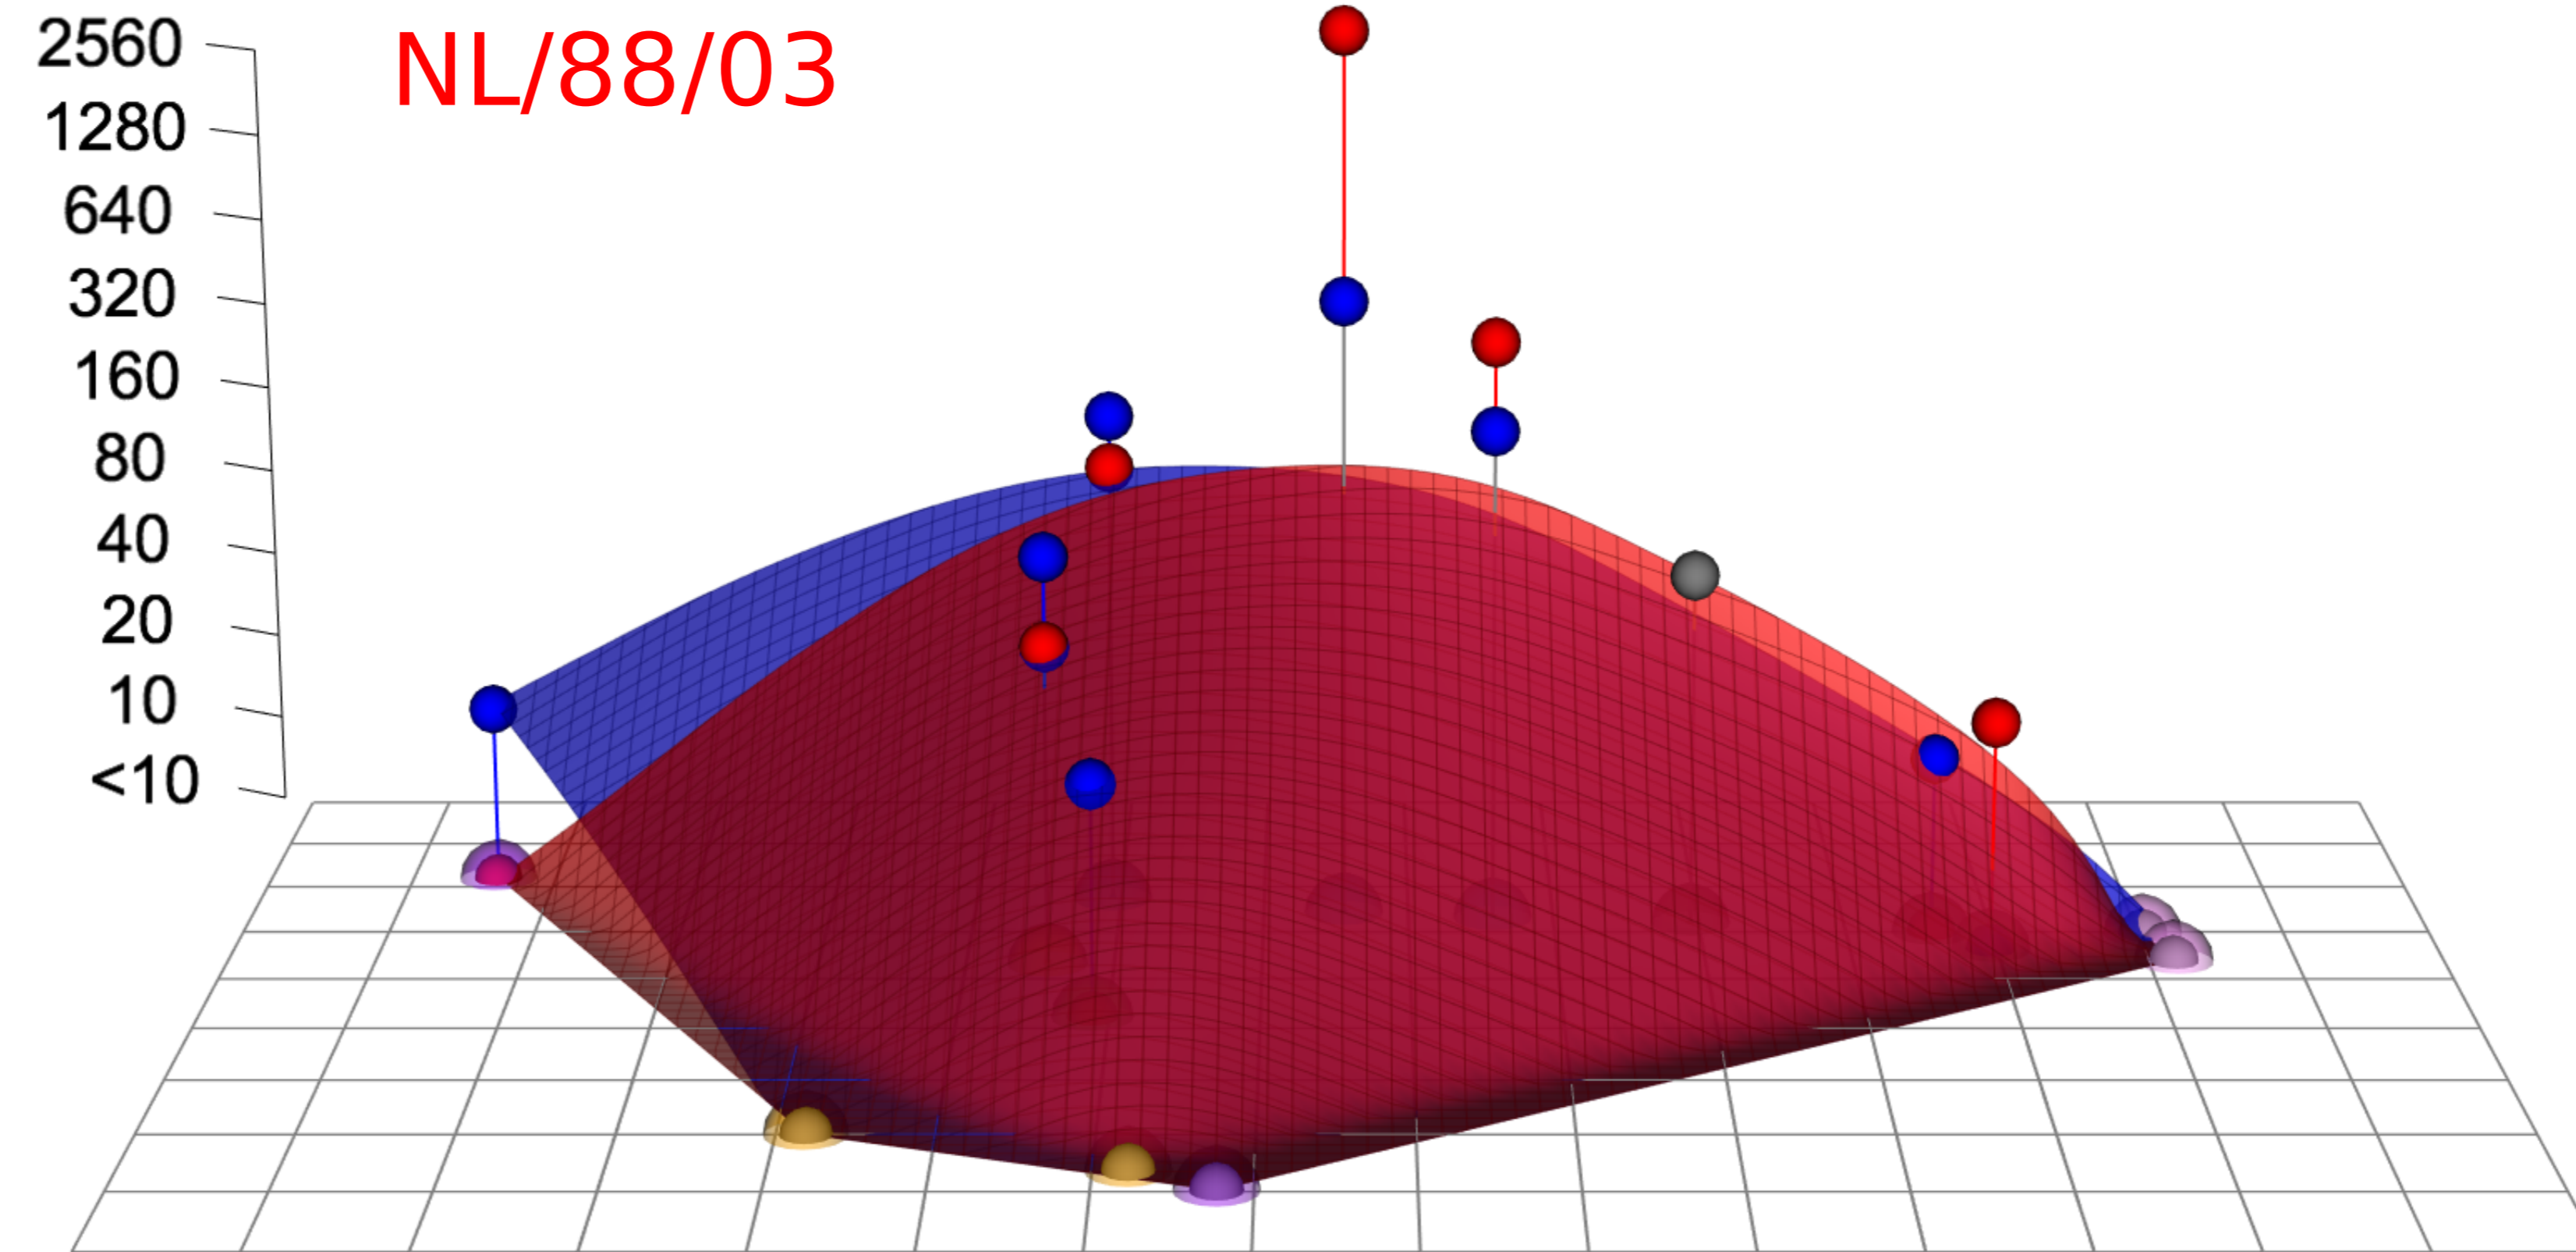

S00-2  
SY/5A/95

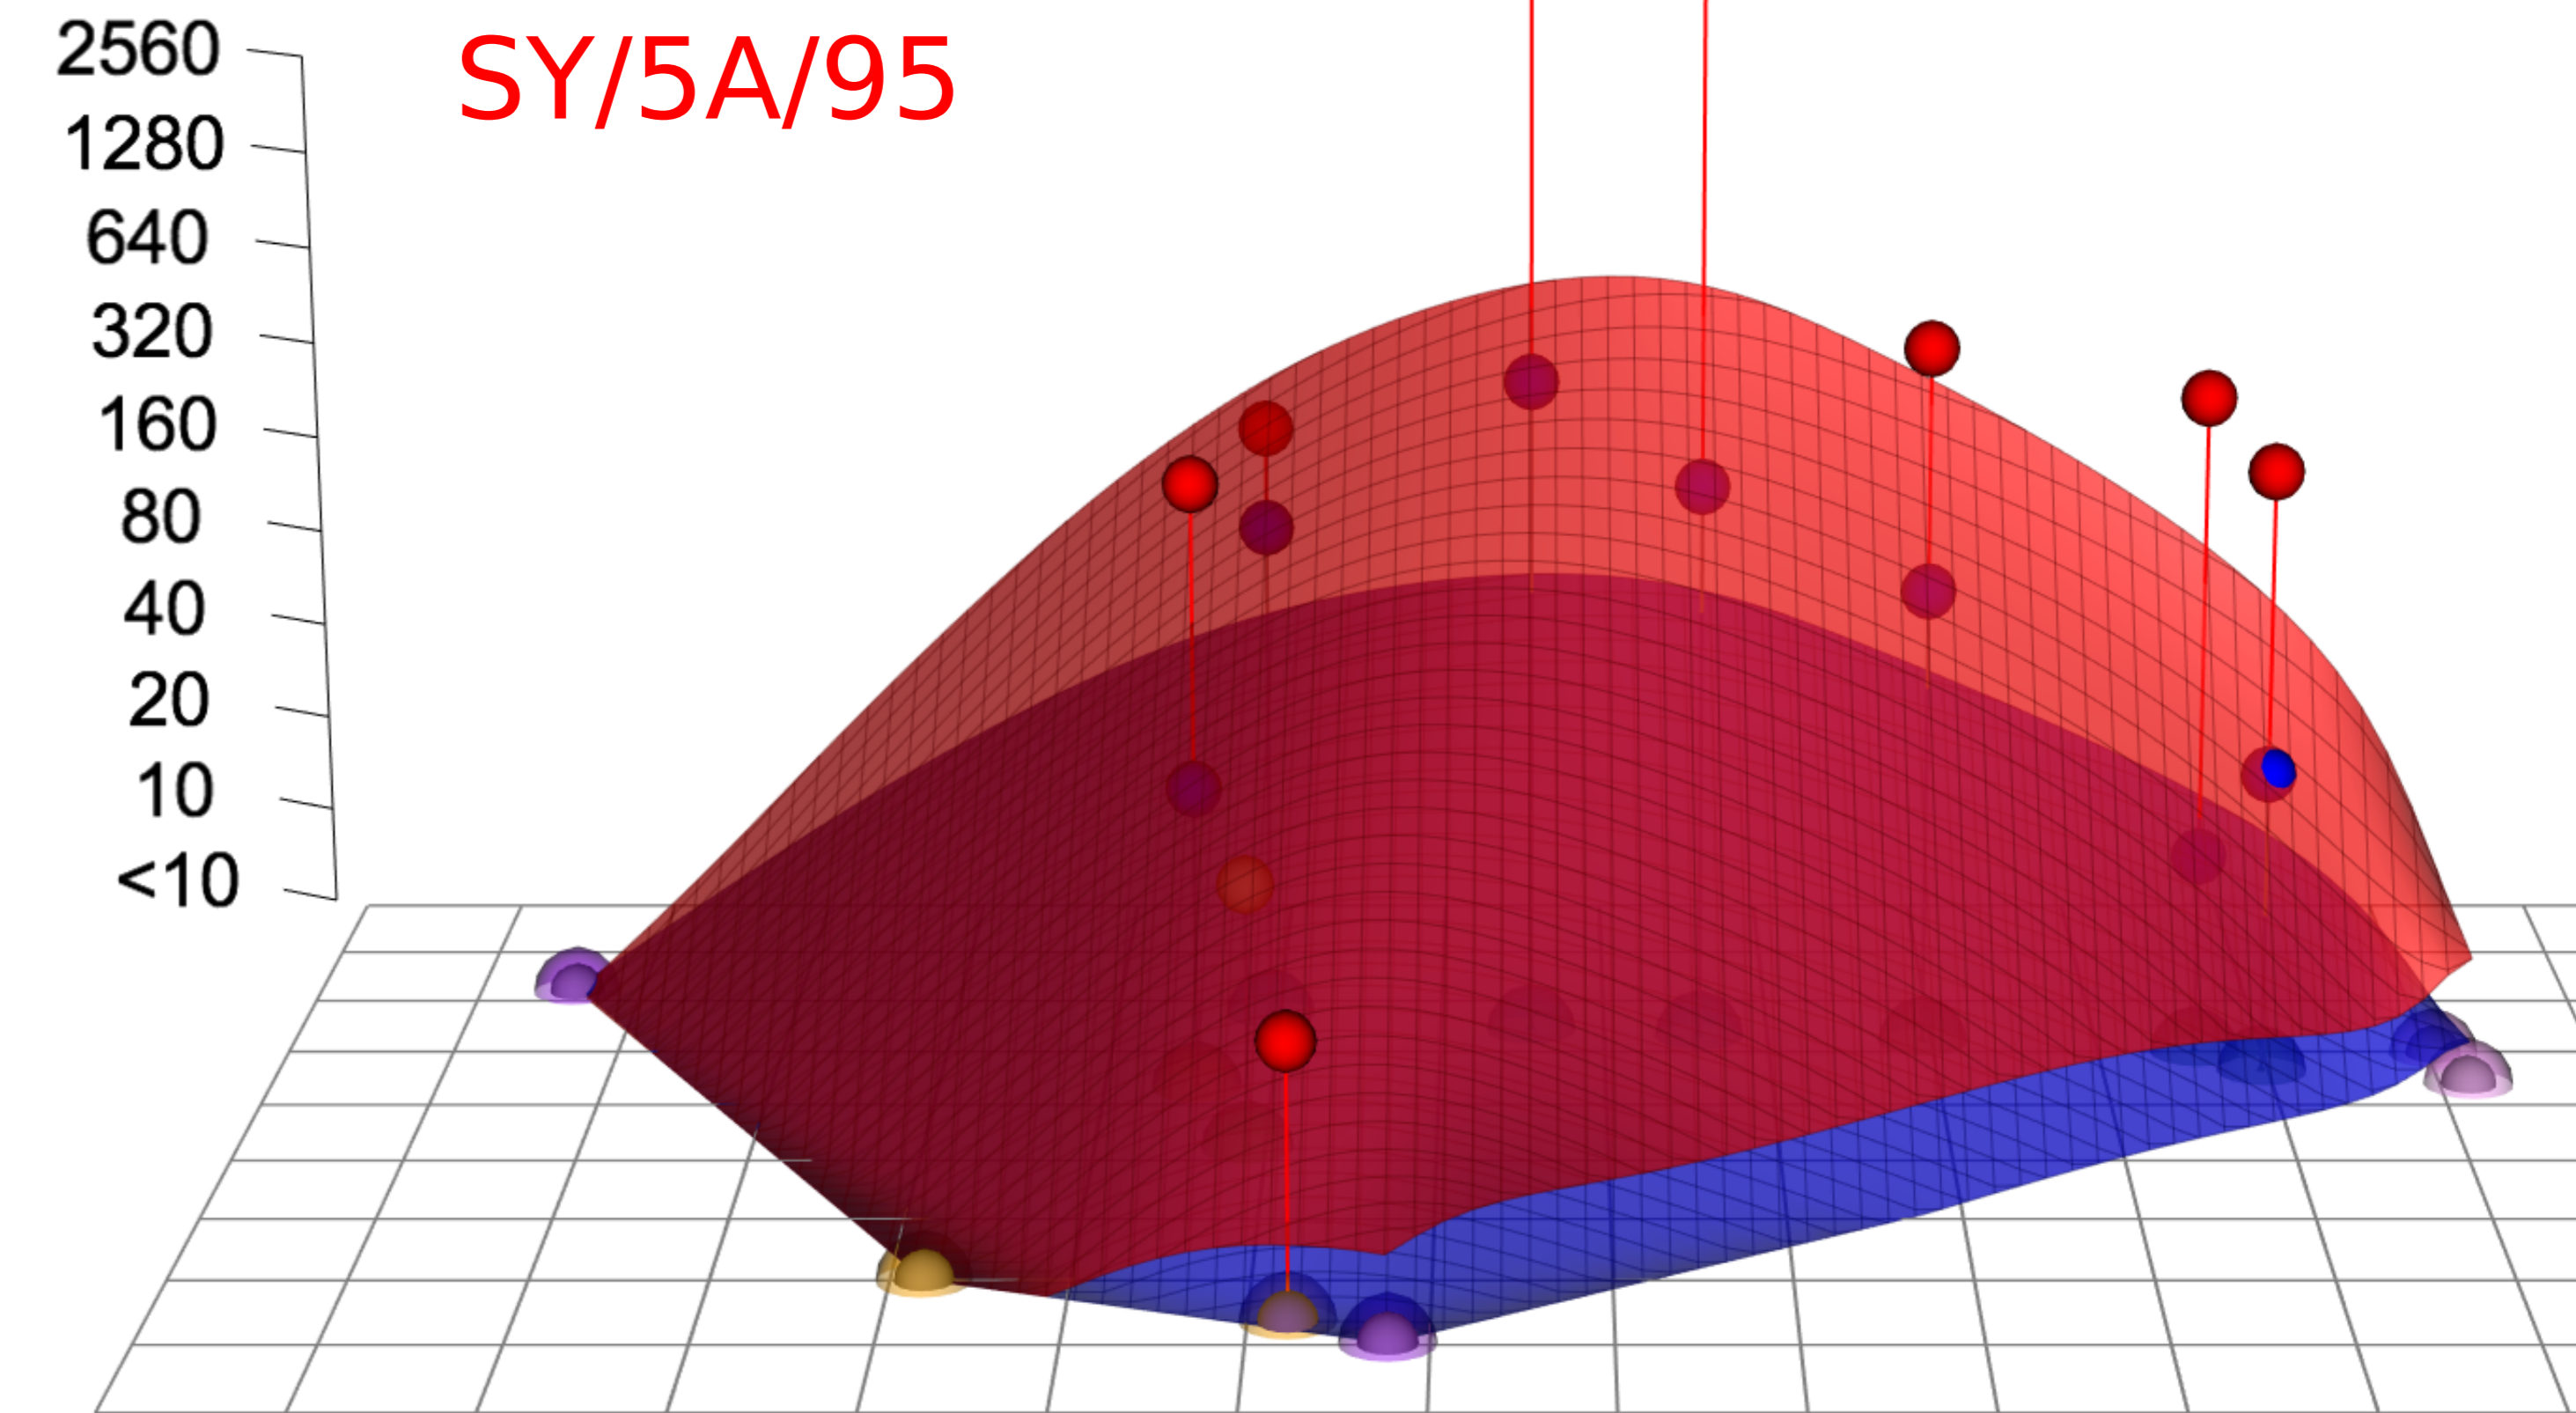

S04-1  
SY/5A/97

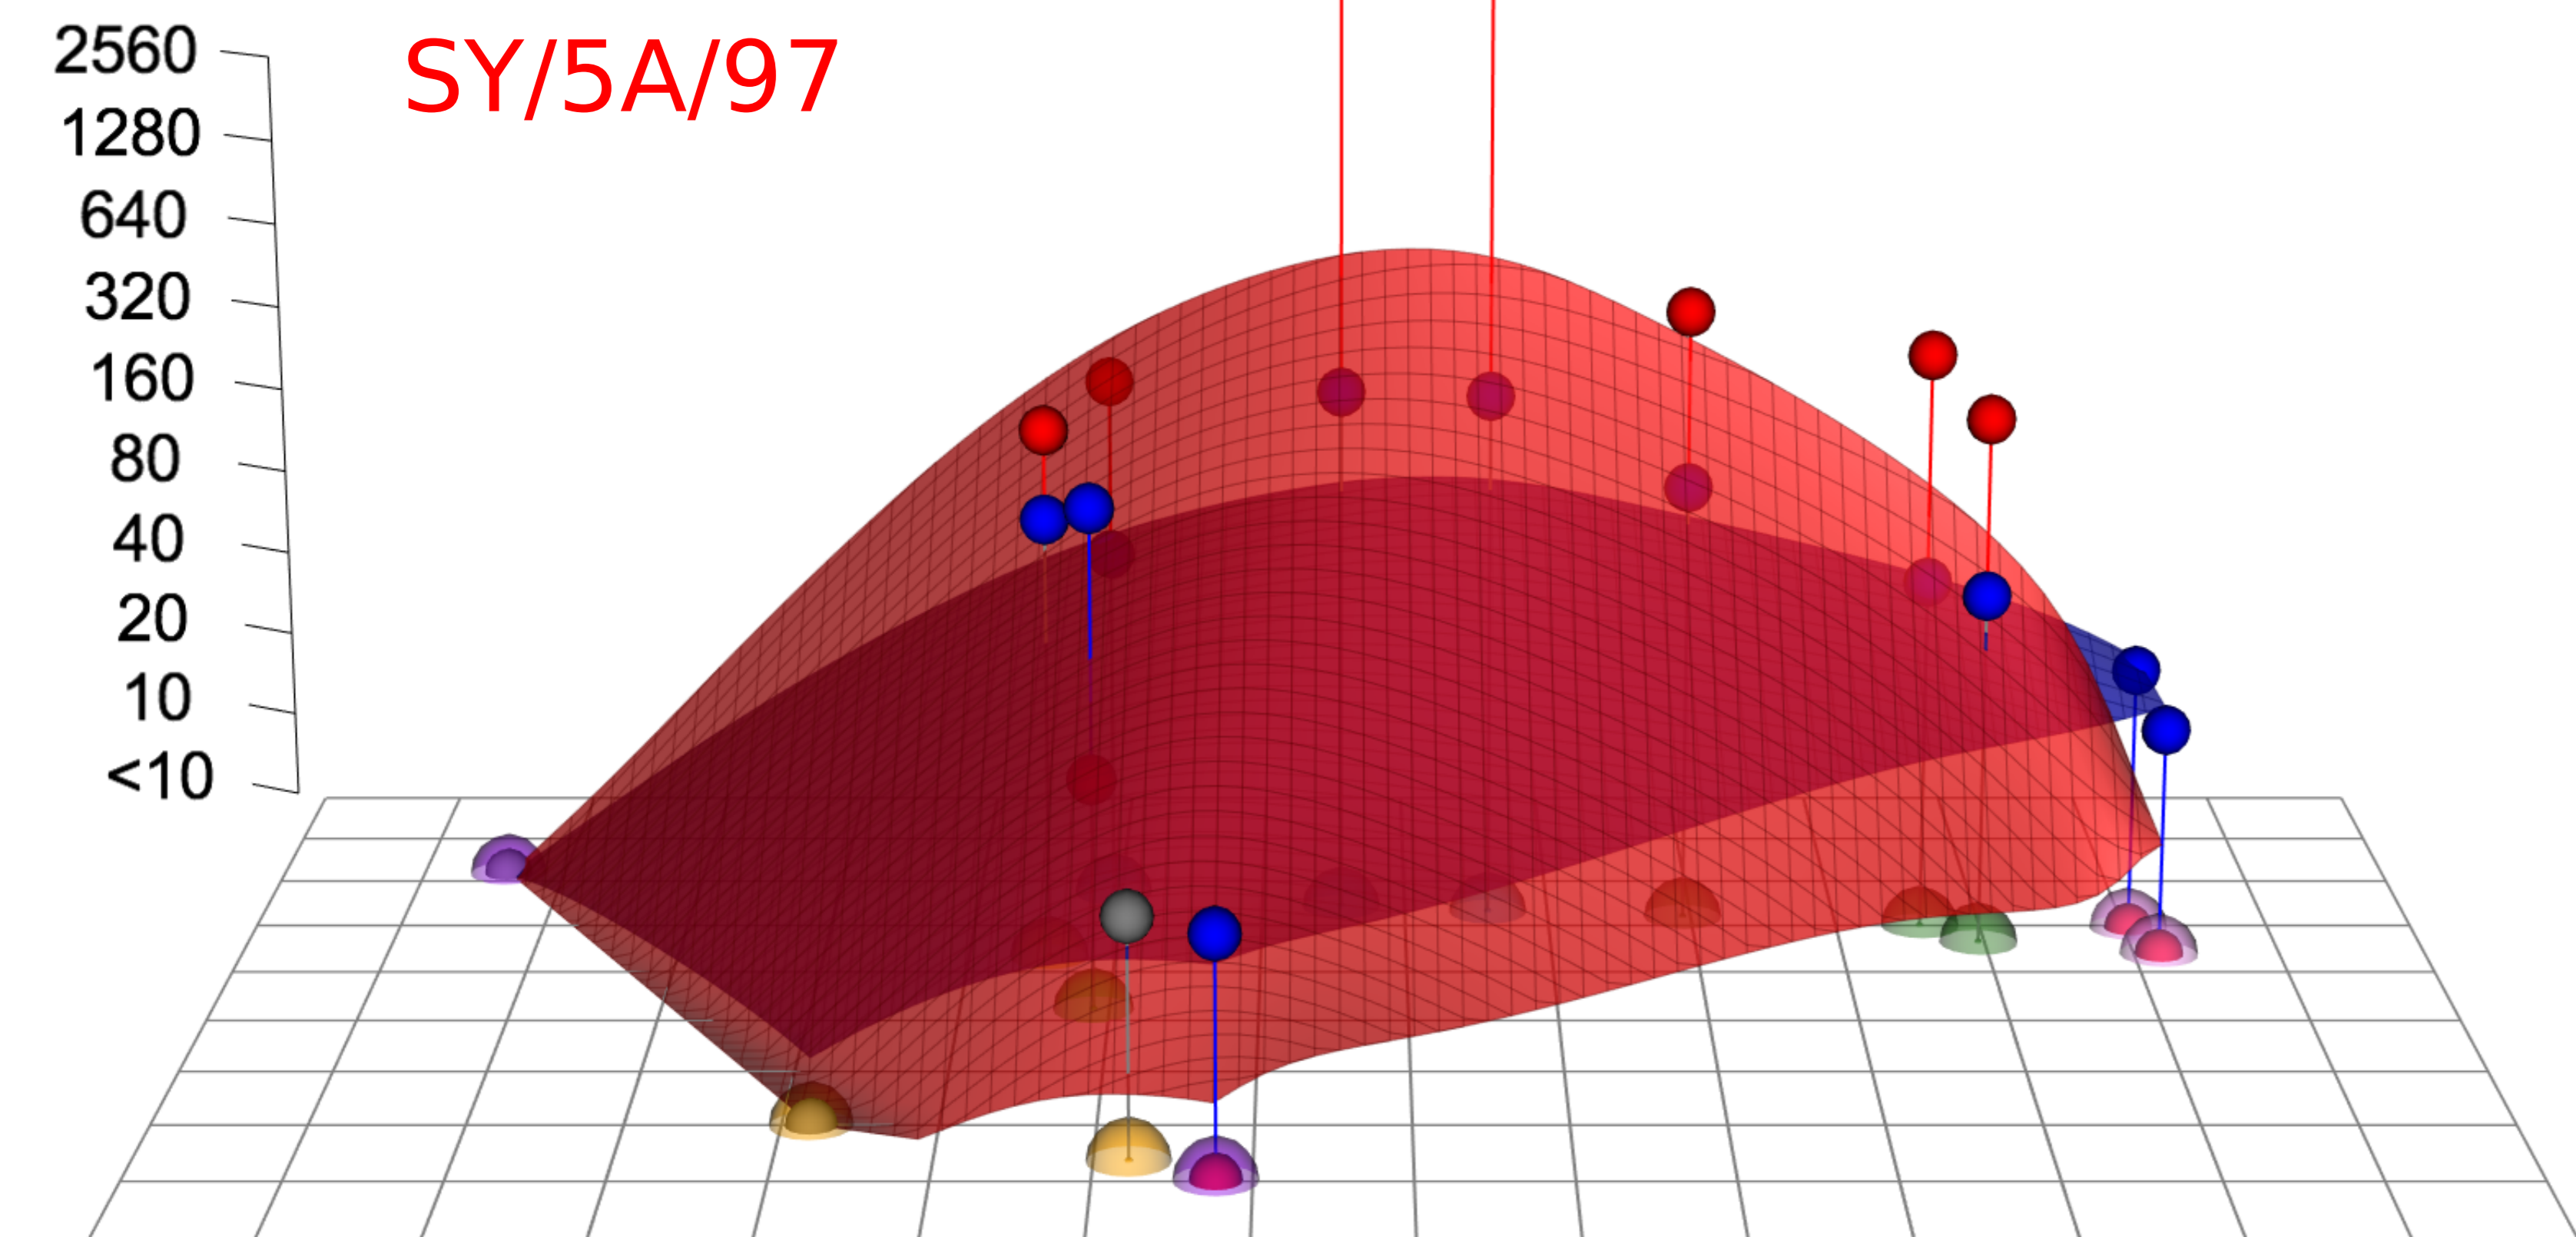

S04-2  
WY/3/03

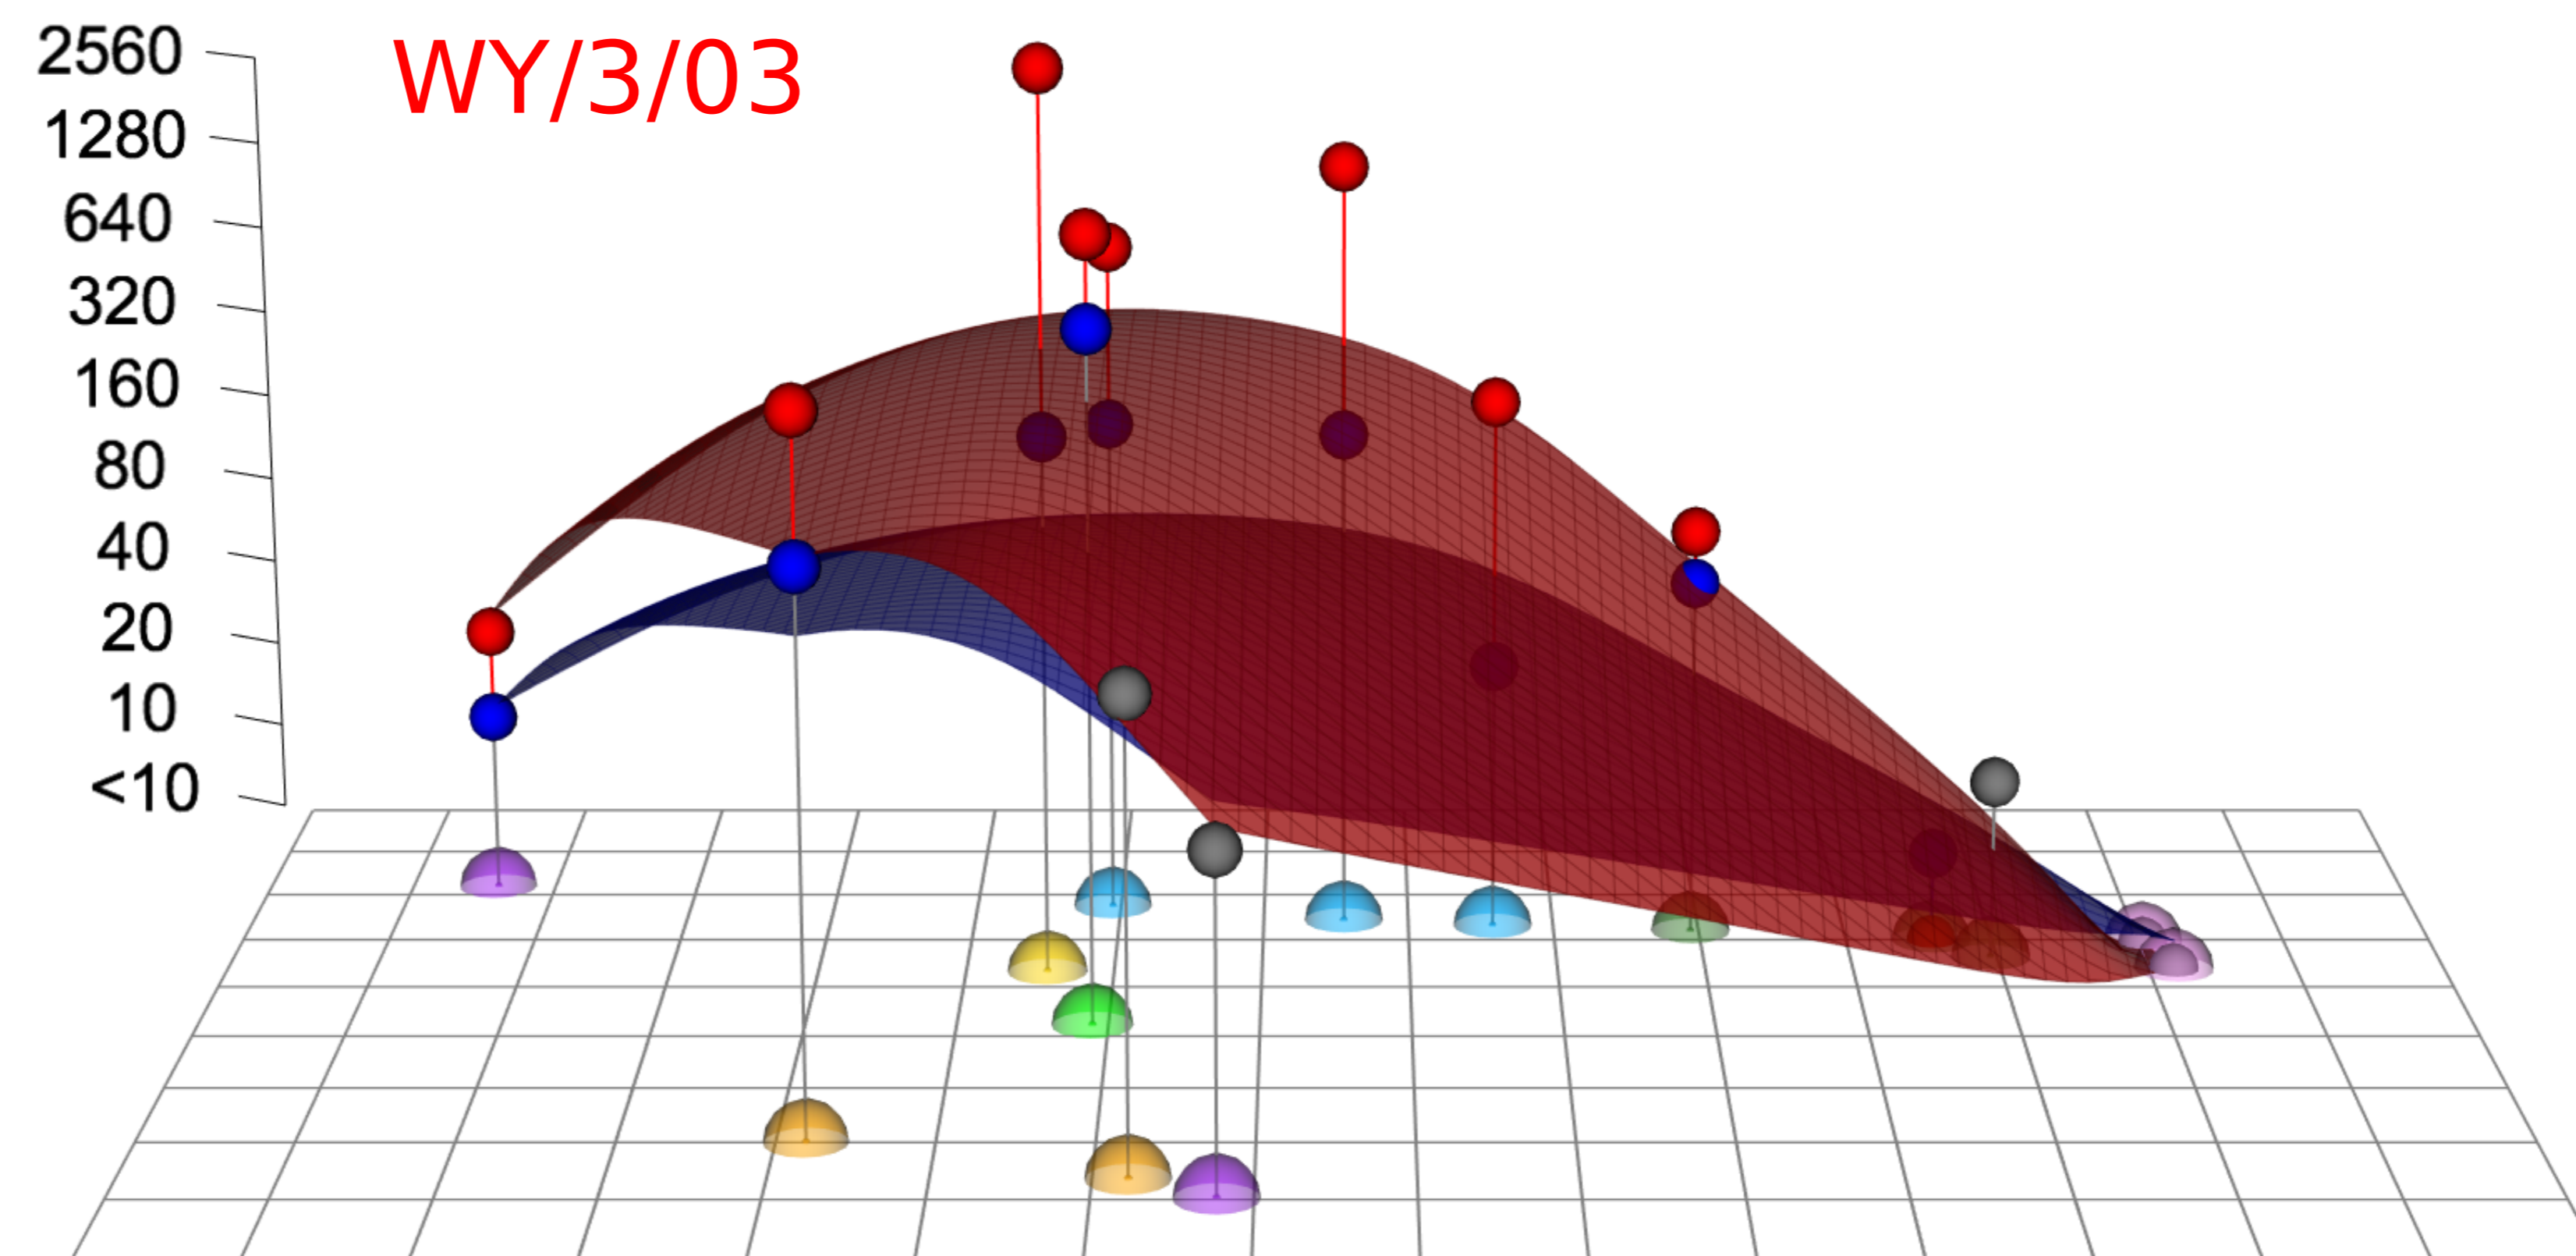

S04-3  
NL/22/03

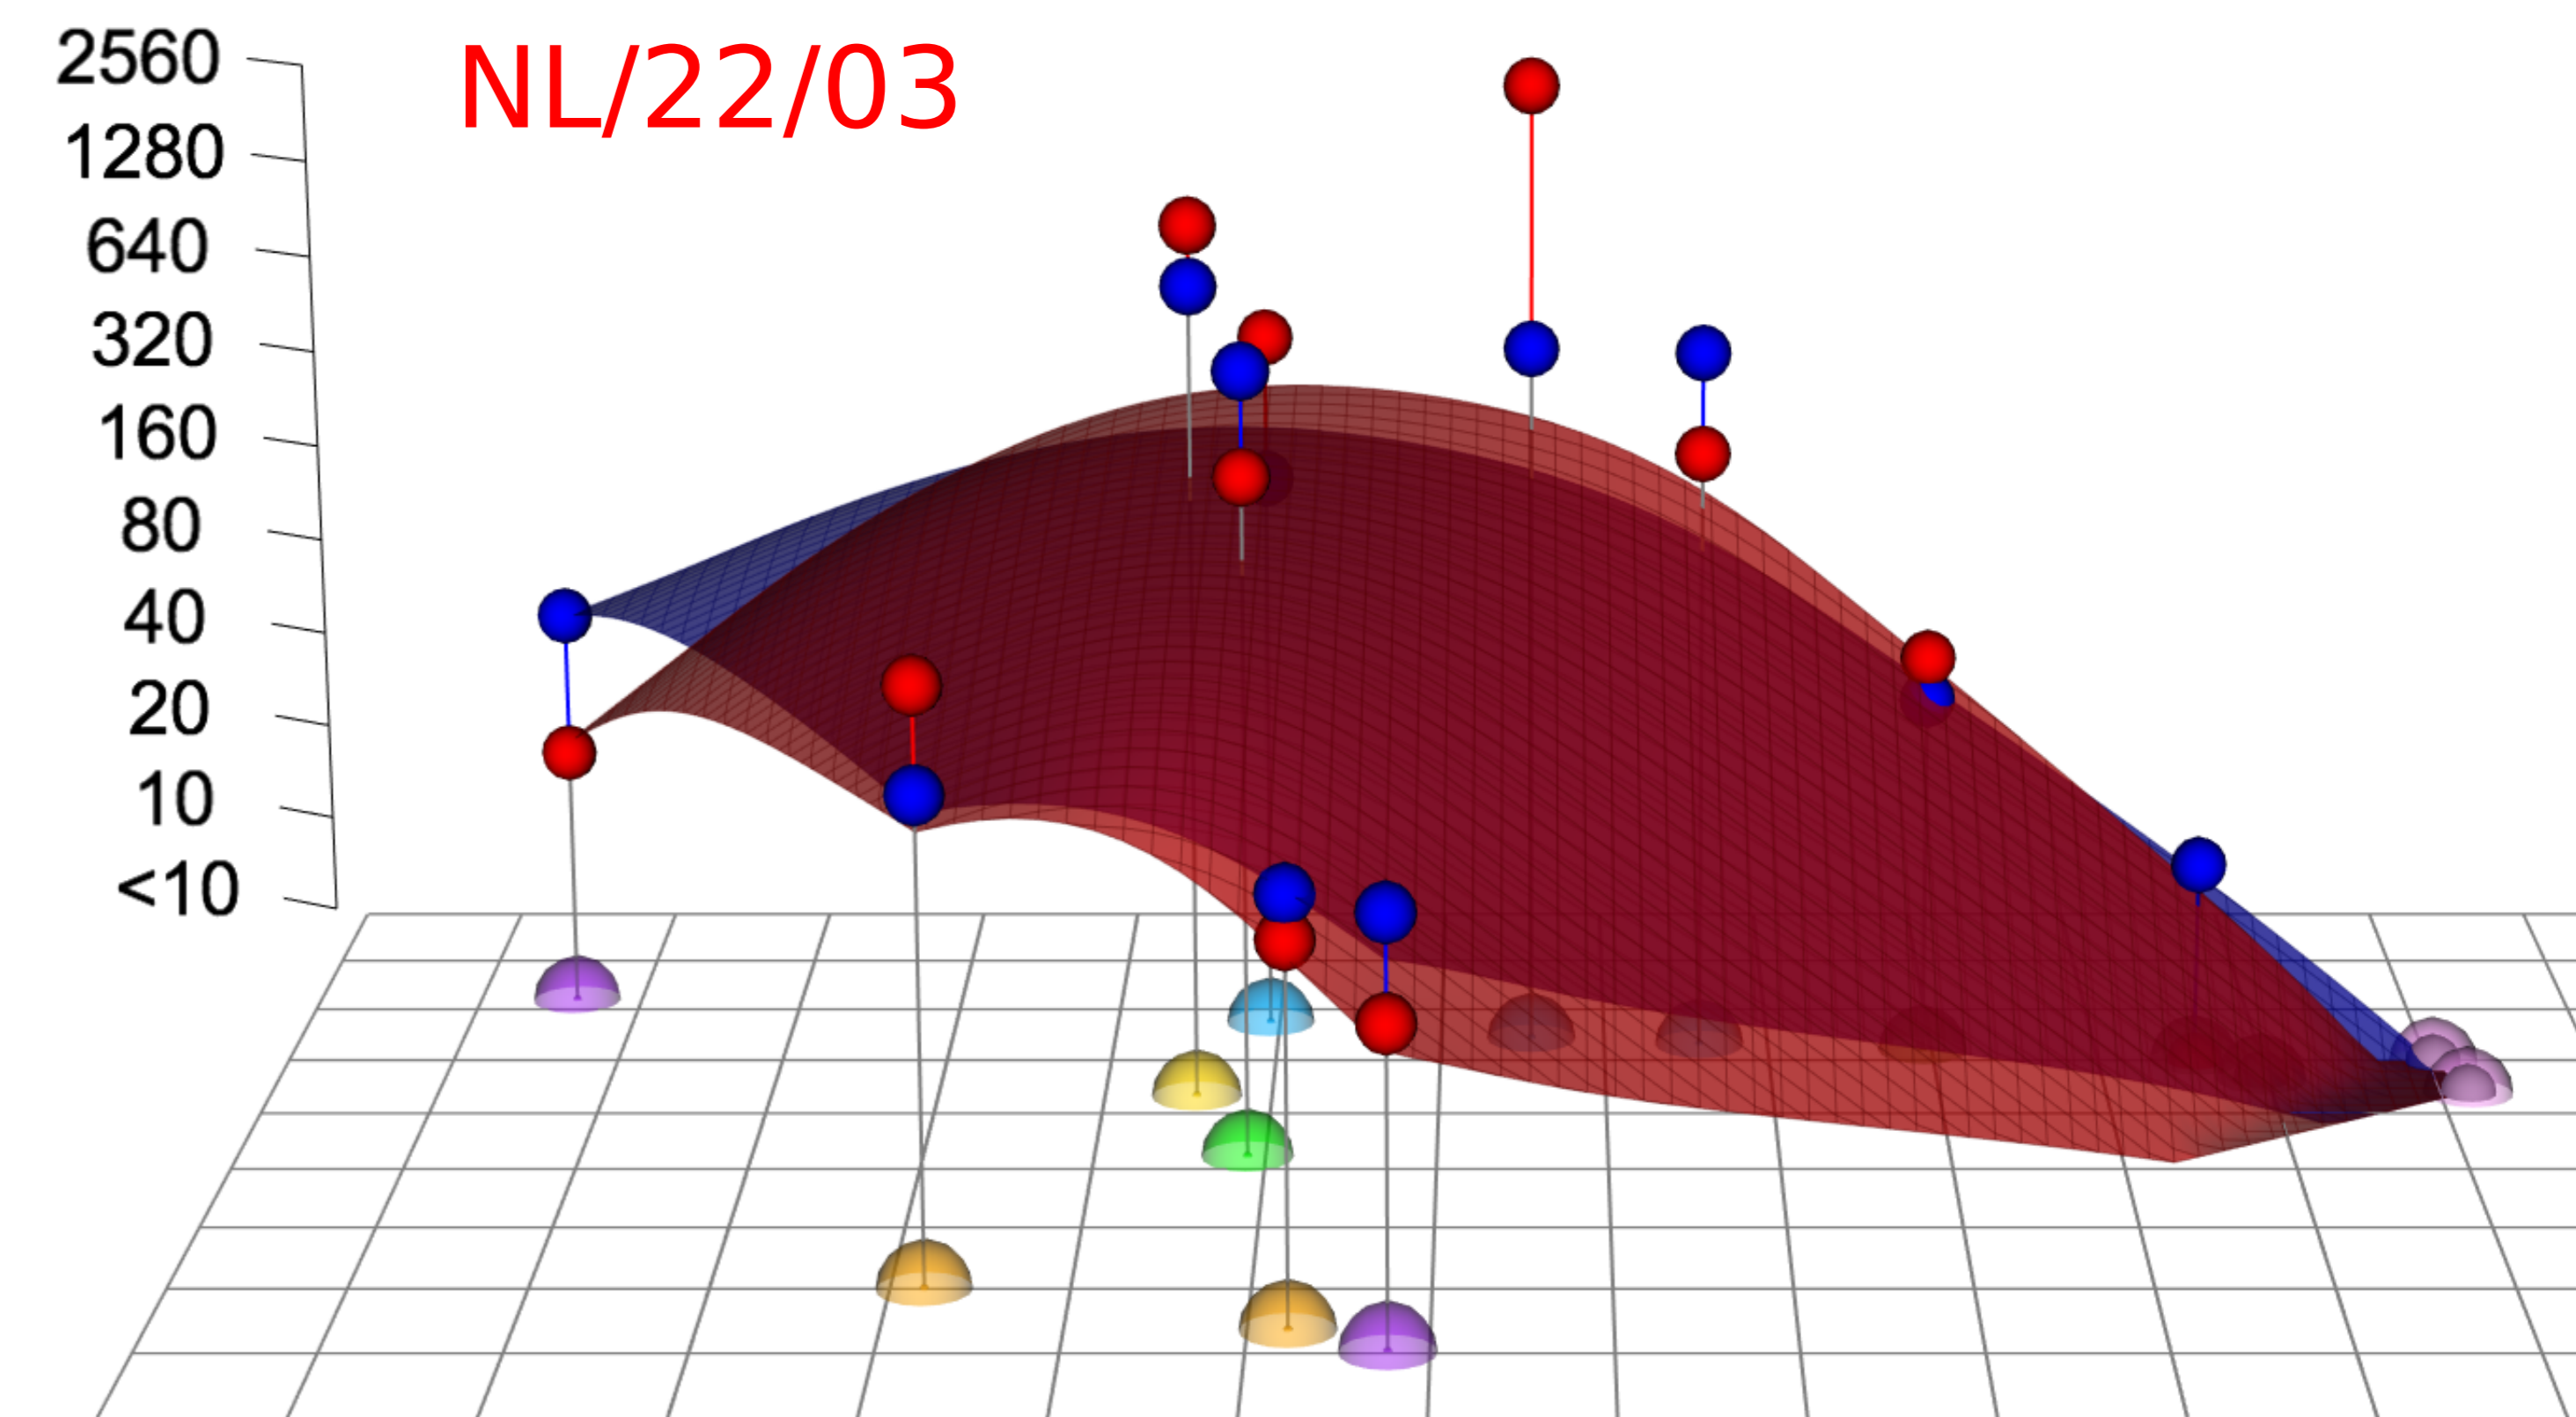

Supplement: supp_jiv367_jiv367supp_figs.pdf [file supp_jiv367_jiv367supp_figs.pdf]
